# Supplementary material
Source: PubMed Central journal article supplement (PMC7211933)
Supplement: pnas.1917448117.sapp.pdf [file pnas.1917448117.sapp.pdf]

1

## 2 **Supplementary Information for**

### 3 **Large H<sub>2</sub>O Solubility in Dense Silica and its Implications for the Interiors of Water-Rich** 4 **Planets**

5 **Carole Nisr, Huawei Chen, Kurt Leinenweber, Andrew Chizmeshya, Vitali Prakapenka, Clemens Prescher, Sergey Tkachev,**  
6 **Yue Meng, Zhenxian Liu, Sang-Heon Shim**

7 **Sang-Heon Shim.**

8 **E-mail: shdshim@gmail.com**

#### 9 **This PDF file includes:**

- 10     Supplementary text
- 11     Figs. S1 to S5
- 12     Tables S1 to S4
- 13     SI References

## 14 Supporting Information Text

### 15 1. Identification of the Ct phase

16 The most notable diagnostic feature of Ct is  $121_{\text{Ct}}$  at  $\sim 1.46 \text{ \AA}$ . The peak does not overlap with any of the lines from Stv  
17 (Fig. 1). The  $110_{\text{Ct}}$ ,  $211_{\text{Ct}}$ , and  $220_{\text{Ct}}$  lines appear as peak splitting of the  $110_{\text{Stv}}$ ,  $211_{\text{Stv}}$ , and  $220_{\text{Stv}}$  lines when the Ct phase  
18 exist. The  $111_{\text{Stv}}$  and  $121_{\text{Ct}}$  lines are the most diagnostic features for the presence of Stv and the Ct phases, respectively.  
19 The  $111_{\text{Stv}}$  is close but does not overlap with  $111_{\text{Ct}}$  because the  $111_{\text{Ct}}$  line shifts away from  $111_{\text{Stv}}$  from the strong distortion  
20 constrained by the  $121_{\text{Ct}}$  position. The  $111_{\text{Ct}}$  overlaps with an Au peak.

21 Based on these criteria, we identified the phases in the Peakpo software (1) by adjusting the unit-cell volume and axial  
22 ratios. Such adjustments normally distinguished the two phases. However, due to the overlapping lines of these two phases, we  
23 do not rule out the possibility that the Ct phase has an even lower symmetry than orthorhombic.

24 We also attempted to fit all the observed silica diffraction lines to a single crystal structure. However, none of the crystal  
25 structures in the rutile-related materials we tested could explain all the diffraction peaks together. We tried a  $\text{CoReO}_3$ -type  
26 structure (orthorhombic  $Cmmm$ ), a tilted stishovite type, a  $\text{VO}_2$ -type (monoclinic  $P2_1/c$ ), as well as the simple shear distorted  
27 versions of the structures, and a twisted  $\text{CoReO}_4$  model. The new lines could be explained best with a two phase mixture: Stv  
28 and the  $\text{CaCl}_2$  type (Ct). We used the  $111_{\text{Stv}}$  peak at  $\sim 1.93 \text{ \AA}$  (Fig. 1a) as the diagnostic line of Stv. The presence of the  
29 shoulders at the 110, 211, and 220 peaks (at  $\sim 2.88 \text{ \AA}$ ,  $\sim 1.49 \text{ \AA}$ , and  $\sim 1.43 \text{ \AA}$ , respectively) in the diffraction patterns (Fig. 1a)  
30 could also confirm the presence of Stv.

## 31 2. Infrared spectroscopy of OH in silica

32 The IR spectra from all the samples measured revealed pronounced peaks in the OH stretching region between 2400 and  
33 3800  $\text{cm}^{-1}$  (Fig. 2 inset and SI Fig. S1). For example, SI Fig. S1 shows the IR spectrum of the recovered sample synthesized  
34 from a dry stishovite +  $\text{H}_2\text{O}$  starting materials at 51 GPa and 2086 K. Although this sample contains the lowest amount of  
35  $\text{H}_2\text{O}$  among the Ct samples (0.4 wt%  $\text{H}_2\text{O}$ ), the IR spectrum showed clear OH bands.

36 The shape of the OH band from Ct suggests that it consists of at least 3–5 peaks, which as also found in Raman spectra (2)  
37 and IR spectra (3) previously reported on hydrous Stv. The peak positions of the lower-frequency features in hydrous Stv  
38 are within the variation we found among our hydrous Ct samples. However, the intensity distribution among the peaks is  
39 noticeably different. For example, while the  $\sim 3200 \text{ cm}^{-1}$  is more pronounced in our spectra, the peak only exists as a shoulder  
40 feature in hydrous Stv. It is important to note that our Ct sample in general contains more  $\text{H}_2\text{O}$  than the reported spectrum  
41 for Stv ( $\sim 1.3$  wt%  $\text{H}_2\text{O}$ ) (3). Furthermore, our samples are hydrous Stv converted from Ct while the samples in ref. 3 were  
42 from hydrous Stv.

43 The features found in the IR spectra of our samples are within a similar spectral range as the OH modes observed for  
44 hydrous ringwoodite samples (4, 5), although there are some important differences in the spectra because of the structural  
45 differences between stishovite and ringwoodite.

### 46 **3. Estimation of H<sub>2</sub>O content**

47 For Stv synthesized at 9 GPa and low temperatures in the multi-anvil press, Spektor et al. (3, 6) found a linear relationship  
48 between the volume expansion and H<sub>2</sub>O content. In their dataset, five samples have the H<sub>2</sub>O content measured directly from  
49 thermogravimetric analysis (TGA). They also reported the unit-cell volumes of these five samples from X-ray diffraction. Later,  
50 Nisir et al. (2) fit the relationship between the H<sub>2</sub>O content and the volume expansion of Stv to a line using these five well  
51 characterized samples (Fig. 2b), providing a way to estimate the H<sub>2</sub>O content from the measured volume expansion.

#### 52 4. First-principles calculations

53 GGA is known to correctly predict the structural energy differences for a range of silica polymorphs with different local  
54 environment, including coordination numbers (7). It is known that LDA yields physical properties of silica more consistent  
55 with experimentally measured values, including unit-cell volume and bulk modulus. We found that the unit-cell volume of  
56 anhydrous Ct from GGA is 5% higher than that of the experimentally reported value (8), similar to previously found for  
57 GGA (7). For LDA, our unit-cell volumes for the anhydrous models (dCt8 and dCt12) are in agreement with experimentally  
58 reported value within 0.2%. Yet it is important to note that the experimentally measured volume is measured at 300 K while  
59 the volumes from DFT are at 0 K. The thermal expansion expected between 0 and 300 K is 0.4%. The unit-cell volumes from  
60 the dCt8 and dCt12 models are essentially identical to each other.

61 Si defects (or H sites) are likely disordered in the experimentally observed Ct phase, because we do not have any evidence  
62 for super-lattice diffraction lines. However, in our DFT, the Si defects (or H sites) are ordered. To reduce artifacts due to  
63 the Si defect ordering, we constrained all three angles of the supercells to be  $90^\circ$  in the simulations. We also ran simulations  
64 without this constraint and found that the angles deviate from  $90^\circ$  for less than  $0.5^\circ$ . We found that the  $\text{CaCl}_2$  type structure  
65 converts to rutile-type structure at 1 bar optimization, consistent with our experimental results.

66 We found that the unit-cell volume of Ct increases linearly with the concentration of  $\text{H}_2\text{O}$  in the crystal structure in both  
67 Ct8 and Ct12 simulations. In addition, despite the difference in cell setup, both model groups (Ct8 and Ct12) are in excellent  
68 agreement with each other. The linear trend can be also postulated for individual model sets (Ct8 and Ct12) independently,  
69 suggesting that the linear trend is not model dependent. We found some differences in the slope of the linear trend between  
70 GGA and LDA. The experimental data points are located between the GGA and LDA trends, as expected.

71 We found that the relationship between unit-cell volume expansion and  $c/a$  ratios is also linear similar to what was found in  
72 experimental data (SI Fig. S3). However, there are some differences as well, particularly noticeable at higher  $\text{H}_2\text{O}$  content.  
73 This is likely because of non-random distribution of Si defects (or H sites) in our DFT models.

## 74 **5. Challenges associated with water content estimations based on IR**

75 The integrated intensity of IR-active OH modes has been used to estimate the amounts of H<sub>2</sub>O for some minerals (9, 10).  
76 Such method should be carefully applied because the frequency and the intensity of the OH modes change sensitively to the  
77 difference in the local structure near H atoms. Although some efforts have been made for such IR methods for hydrous Stv  
78 (11), the calibration was made for Stv with a significant amount of Al. Furthermore, the presented spectra for their calibration  
79 is significantly different from those of our Al-free dense silica, suggesting fundamental difference in the local structure of the  
80 H atoms and therefore preventing us from adapting the method. The most severe problem of applying the methods to the  
81 LHDAC sample is that the thickness of the sample is very difficult to measure. Although the samples were cold compressed to  
82 make thin and well-packed polycrystalline foils, we found that after recovery from LHDAC runs, the samples were no longer  
83 well-packed and even porous, likely because of the hydrothermal reaction. Therefore, it is very difficult to obtain reliable  
84 thickness. Despite the uncertainty, we found that application of Paterson's method (9) yields similar values as ones presented  
85 in SI tab. S1, if we assume a thickness of 5–10 microns.

## 86 **6. Provisional phase diagram of SiO<sub>2</sub>-H<sub>2</sub>O**

87 We observed that stable phases change with pressure in the SiO<sub>2</sub>-H<sub>2</sub>O system as a function of pressure. Therefore, it is of  
88 interest to build a phase diagram in  $P$ - $X(\text{H}_2\text{O})$  where  $X(\text{H}_2\text{O})$  is molar content of H<sub>2</sub>O in SiO<sub>2</sub>. Because we have estimates  
89 for the content of H<sub>2</sub>O for Ct, here we focus more on the lower pressure regime for the provisional phase diagram (Fig. 3b).  
90 Because of a range of temperatures in our data, we focus on 1400–1500 K and compare the result with a few data points at  
91 1700 K and 900 K (Fig. 3b).

92 To constrain the stability field of pure Stv and Ct phases, we use two data points: one multi-anvil data point at 10 GPa and  
93 1500 K shows the stability of pure Stv with a low H<sub>2</sub>O content, while at 45 GPa and 1740 K we found the stability of pure Ct  
94 with a large H<sub>2</sub>O content in an LHDAC experiments. We then use two LHDAC data points where we found two Stv phases  
95 with different H<sub>2</sub>O in the recovered samples from Ct + Stv at high pressure. These two data points provide constraints for the  
96 mixed phase region in the phase diagram. Because of the large uncertainties in  $X(\text{H}_2\text{O})$  from LHDAC and paucity of data  
97 points, we found it is difficult to fit to a single trend. However, a high-precision data point obtained from multi-anvil press at  
98 20 GPa and 900 K supports the inferred phase boundaries in the diagram. The phase fields involving Nt is largely hypothesized  
99 from our H<sub>2</sub>O estimations (see the main text) and experimental observations.

## 100 **7. Equation of state of the Nt phase**

101 We obtained the unit-cell volumes of the Nt phase from diffraction patterns measured during decompression. The unit-cell  
102 volumes were calculated from at least 3 or 4 diffraction lines for the hexagonal unit cell. We fit the unit-cell volumes of the Nt  
103 phase to the second order Birch–Murnaghan equation. In the fitting, we fixed the volume at 1.3 GPa (the lowest pressure data  
104 point) to a measured value. The pressure derivative of bulk modulus was fixed to 4 in the fitting.



**Table S1.** Experimental conditions, observed phases, and H<sub>2</sub>O content for dense hydrous silica polymorphs. Pressure (*P*) and temperature (*T*) are averages of the values measured during the heating cycles. Pressures at high temperatures are calculated from the measured unit-cell volumes of Au or Pt combined with their  $P$ - $V$ - $T$  equations of state (12). H<sub>2</sub>O contents were estimated combined with the measured unit-cell volumes in table S2. SM: starting materials, hGel: hydrous silica gel, dGla: anhydrous silica glass, dStv: anhydrous stishovite, Calib.: pressure calibrants, Initial: phases observed at the initial stage of heating, Final: phases observed at the final stage of heating, Quench: phases in the quenched samples, Stv: stishovite, Ct: CaCl<sub>2</sub>-type silica phase, and Nt: NiAs-type silica phase.

| Run   | SM   | Medium           | Calib. | Dur. (min) | <i>P</i> (GPa) | <i>T</i> (K) | Initial     | Final       | Quench  | H <sub>2</sub> O (wt%) |
|-------|------|------------------|--------|------------|----------------|--------------|-------------|-------------|---------|------------------------|
| 512   | dGla | H <sub>2</sub> O | Pt     | 12         | 24.0(23)       | 1452(100)    | Stv         | Ct, Stv     | Stv     | 8.4(11)                |
|       | dGla | H <sub>2</sub> O | Pt     | 12         | 24.0(23)       | 1452(100)    | Stv         | Ct, Stv     | Stv     | 1.1(2)                 |
| 502   | dGla | H <sub>2</sub> O | Pt     | 10         | 48.0(6)        | 1464(100)    | Ct, Stv     | Ct, Stv     | Stv     | 7.7(10)                |
|       | dGla | H <sub>2</sub> O | Pt     | 10         | 48.0(6)        | 1464(100)    | Ct, Stv     | Ct, Stv     | Stv     | 2.0(3)                 |
| 618   | dGla | H <sub>2</sub> O | Pt     | 25         | 65.0(51)       | 1997(191)    | Ct, Stv     | Nt, Ct, Stv | Stv     | 5.6(7)                 |
| 319   | dGla | H <sub>2</sub> O | Pt     | 10         | 67.0(20)       | 1911(100)    | Nt, Ct, Stv | Nt, Ct, Stv | Stv     | 5.2(7)                 |
| 404   | hGel | Ne               | Au     | 33         | 45.0(15)       | 1740(100)    | Ct, Stv     | Ct          | Stv, Ct | 7.1(9)                 |
| 402   | hGel | Ar               | Au     | 24         | 59.0(14)       | 1564(100)    | Nt          | Nt          |         |                        |
| 303   | hGel | Ne               | Pt     | 5          | 56.0(4)        | 1506(100)    | Ct, Stv     | Ct, Stv     | Stv     | 3.5(5)                 |
| 119a  | hGel | Ar               | Pt     | 10         | 59.0(18)       | 1998(100)    | Nt, Stv     | Nt, Ct, Stv | Stv     | 2.1(3)                 |
| 603   | hGel | Ne               | Pt     | 5          | 42.0(4)        | 1554(100)    | Ct, Stv     | Ct, Stv     | Stv     | 1.1(2)                 |
| 119b  | dStv | H <sub>2</sub> O | Pt     | 10         | 51.0(23)       | 2086(269)    | Ct, Stv     | Ct, Stv     | Stv     | 0.4(1)                 |
| MB102 | hGel | None             | Pt     | 15         | 96.0(42)       | 2077(100)    | Nt, Ct      | Nt, Ct      |         |                        |
| MB202 | hGel | H <sub>2</sub> O | Au     | 15         | 107.0(15)      | 1736(164)    | Nt          | Nt          | Nt      |                        |
| MB317 | dGla | H <sub>2</sub> O | Au     | 12         | 87.0(18)       | 1679(178)    | Nt          | Nt          |         |                        |
| MB308 | dGla | H <sub>2</sub> O | Au     | 33         | 82.0(8)        | 1617(182)    | Nt          | Nt          |         |                        |
| MB402 | dGla | H <sub>2</sub> O | Pt     | 16         | 64.0(15)       | 1699(100)    | Nt          | Nt          |         |                        |
| MB602 | hGel | H <sub>2</sub> O | Au     | 12         | 111.0(14)      | 1700(141)    | Nt          | Nt          |         |                        |

**Table S2.** The unit-cell parameters of the stishovite phase at 1 bar and 300 K after recovery from high-pressure experiments. For runs 512, 502, and Samp5, we detected two different Stv phases with different unit-cell volumes. The numbers in the parentheses are the estimated  $1\sigma$  uncertainties.

| Run  | $a_0$ (Å)  | $c_0$ (Å)  | $V_0$ (Å <sup>3</sup> ) |
|------|------------|------------|-------------------------|
| 512  | 4.2550(11) | 2.6697(33) | 48.34(5)                |
|      | 4.1888(11) | 2.6651(20) | 46.76(3)                |
| 502  | 4.2497(10) | 2.6671(20) | 48.17(3)                |
|      | 4.1962(10) | 2.6663(20) | 46.95(3)                |
| 618  | 4.2299(10) | 2.6672(7)  | 47.72(2)                |
| 319  | 4.2260(9)  | 2.6680(7)  | 47.65(2)                |
| 404  | 4.2451(10) | 2.6660(8)  | 48.04(2)                |
| 303  | 4.2121(11) | 2.6649(7)  | 47.28(2)                |
| 119a | 4.1970(8)  | 2.6659(6)  | 46.96(2)                |
| 603  | 4.1880(9)  | 2.6659(13) | 46.76(2)                |
| 119b | 4.1816(9)  | 2.6652(7)  | 46.60(2)                |

**Table S3.** Unit-cell parameters of the niccolite-type silica phase at high pressure and 300 K. The numbers in the parentheses are the estimated  $1\sigma$  uncertainties.

| $P$ (GPa) | $a$ (Å)   | $c$ (Å)  | $V$ (Å <sup>3</sup> ) |
|-----------|-----------|----------|-----------------------|
| 93.0(12)  | 2.4029(6) | 3.805(3) | 19.02(1)              |
| 88.4(11)  | 2.4106(6) | 3.814(3) | 19.20(1)              |
| 80.8(10)  | 2.4196(6) | 3.834(3) | 19.44(1)              |
| 71.6(10)  | 2.4334(6) | 3.849(3) | 19.74(1)              |
| 54.6(8)   | 2.4741(6) | 3.942(3) | 20.90(1)              |
| 21.5(5)   | 2.5475(7) | 4.087(3) | 22.97(2)              |
| 1.3(3)    | 2.5848(7) | 4.177(3) | 24.17(2)              |

**Table S4.** The diffraction peak positions of the Ct silica phase and Stv at high pressures and 300 K. At 40.4 GPa and 300 K, we observed both Ct ( $a = 4.143(3) \text{ \AA}$ ,  $b = 3.960(2) \text{ \AA}$ ,  $c = 2.519(2) \text{ \AA}$ ) and Stv ( $a = 4.051(1) \text{ \AA}$ ,  $c = 2.591(8) \text{ \AA}$ ). At 36.9 GPa, we observed pure Ct ( $a = 4.151(3) \text{ \AA}$ ,  $b = 3.970(3) \text{ \AA}$ ,  $c = 2.529(1) \text{ \AA}$ ).  $hkl$ 's are the Miller indices.  $d_{\text{obs}}$  and  $d_{\text{cal}}$  are the observed and calculated  $d$ -spacings, respectively, and  $\Delta d$  is the difference between them.

| $h$                    | $k$ | $l$ | $d_{\text{obs}} (\text{\AA})$ | $d_{\text{cal}} (\text{\AA})$ | $\Delta d (\text{\AA})$ |
|------------------------|-----|-----|-------------------------------|-------------------------------|-------------------------|
| <i>Ct at 40.4 GPa</i>  |     |     |                               |                               |                         |
| 1                      | 1   | 0   | 2.8618                        | 2.8628                        | -0.0010                 |
| 0                      | 2   | 0   | 1.9811                        | 1.9800                        | 0.0011                  |
| 1                      | 1   | 1   | 1.8907                        | 1.8913                        | -0.0006                 |
| 2                      | 1   | 1   | 1.4844                        | 1.4836                        | 0.0008                  |
| 1                      | 2   | 1   | 1.4570                        | 1.4573                        | -0.0003                 |
| 2                      | 2   | 0   | 1.4310                        | 1.4314                        | -0.0004                 |
| <i>Stv at 40.4 GPa</i> |     |     |                               |                               |                         |
| 1                      | 0   | 1   | 2.1805                        | 2.1829                        | -0.0024                 |
| 1                      | 1   | 1   | 1.9220                        | 1.9216                        | 0.0004                  |
| 2                      | 1   | 0   | 1.8120                        | 1.8115                        | 0.0005                  |
| 0                      | 0   | 2   | 1.2958                        | 1.2957                        | 0.0001                  |
| 3                      | 1   | 0   | 1.2805                        | 1.2809                        | -0.0005                 |
| 2                      | 2   | 1   | 1.2539                        | 1.2534                        | 0.0005                  |
| <i>Ct at 36.9 GPa</i>  |     |     |                               |                               |                         |
| 1                      | 1   | 0   | 2.8659                        | 2.8689                        | -0.0030                 |
| 1                      | 0   | 1   | 2.1594                        | 2.1596                        | -0.0002                 |
| 1                      | 1   | 1   | 1.8967                        | 1.8971                        | -0.0004                 |
| 2                      | 1   | 1   | 1.4877                        | 1.4874                        | 0.0003                  |
| 1                      | 2   | 1   | 1.4617                        | 1.4614                        | 0.0003                  |
| 2                      | 2   | 0   | 1.4346                        | 1.4344                        | 0.0002                  |

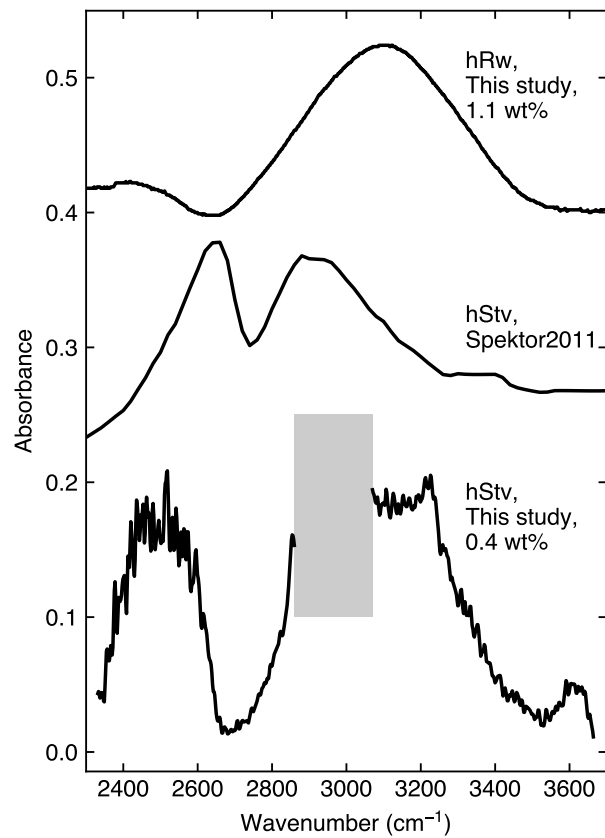

**Fig. S1.** Infrared spectrum of hydrous dense silica synthesized from an anhydrous Stv + H<sub>2</sub>O starting mixture at 51 GPa and 2086 K. We compare the spectrum with hydrous Stv (3) and hydrous ringwoodite. We grayed area between 2850 and 3100 cm<sup>-1</sup> because of extra features from the optics of the beamline system (13). Note that the measurement conditions, including the thickness of the samples, are different.

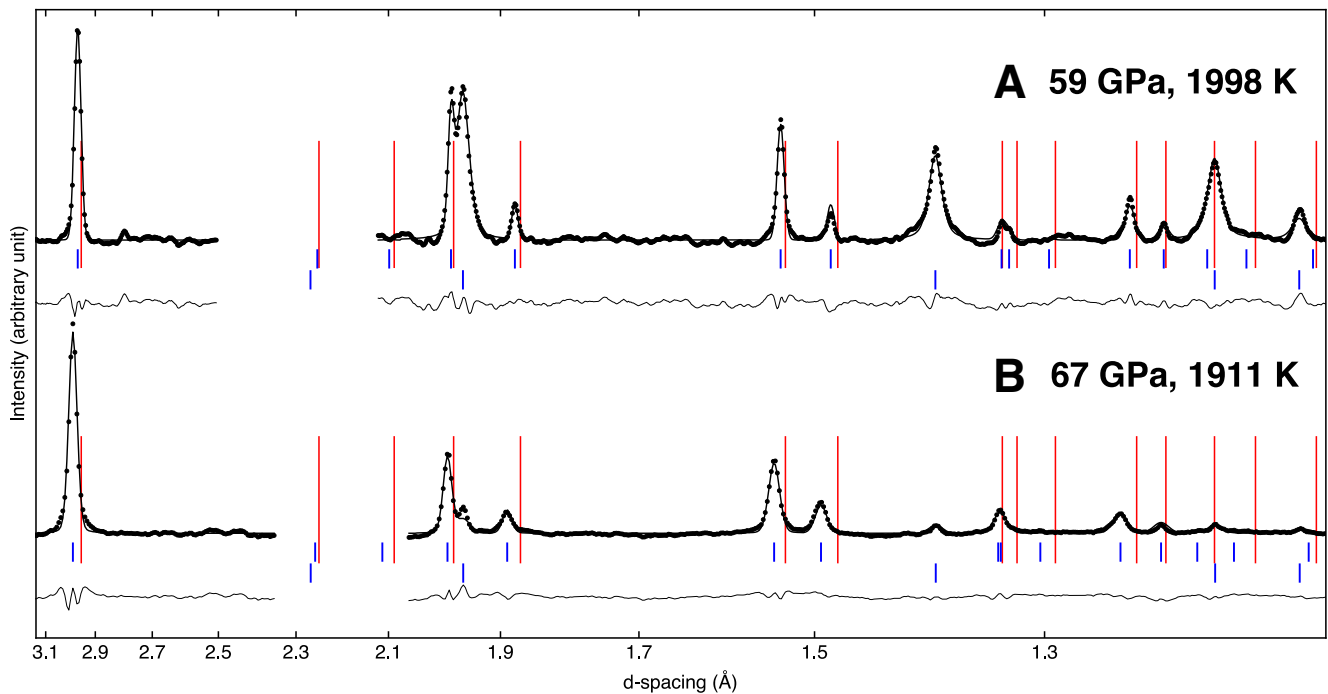

**Fig. S2.** Rietveld refinements of the diffraction patterns from dense hydrous silica at 1 bar and 300 K: (A) 119a and (B) 319 with 2.1, and 5.2 wt% H<sub>2</sub>O, respectively (SI Tab. S1). The fit residues after background subtraction,  $R_{wp-bknd}$ , were 1.2% and 2.3% for (A) and (B), respectively. The black dots are the data, the solid black lines are the calculated patterns after fitting, and the thin black lines below the patterns are the difference between the fit and the observed intensities. The vertical red bars show the peak positions expected for anhydrous Stv, highlighting the systematic shifts of the observed diffraction lines. The upper and lower tick marks indicate the peak positions of hydrous Stv and the internal pressure standard and laser coupler (platinum), respectively. We did not fit a  $d$ -spacing range between 2.1 and 2.5 Å because of the severe overlap between  $101_{Stv}$  and  $111_{Pt}$ .

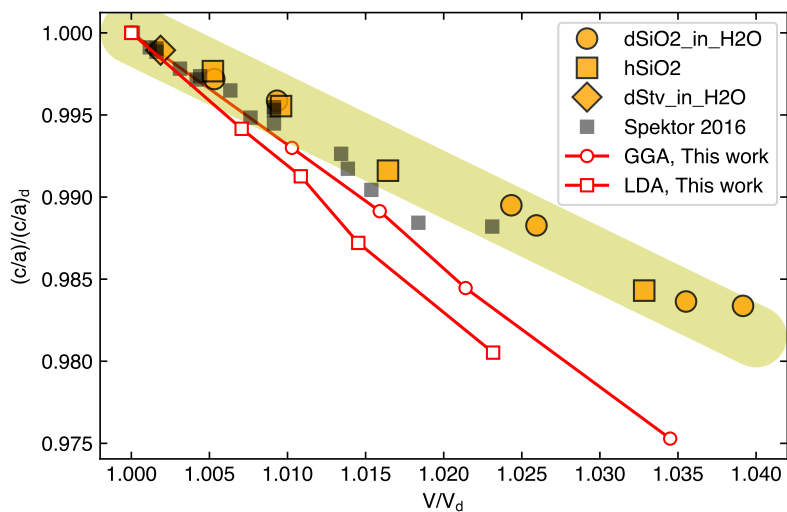

**Fig. S3.** The  $c/a$  ratio of the Stv recovered from hydrothermal synthesis of Ct. The yellow shapes represent different starting sample setups: dry silica glass in a H<sub>2</sub>O medium (circles), hydrous silica gel in a Ne or Ar medium (squares), and dry Stv in a H<sub>2</sub>O medium (diamonds). The gray squares are for hydrous Stv from a previous study (6). We also show our DFT results for comparison.

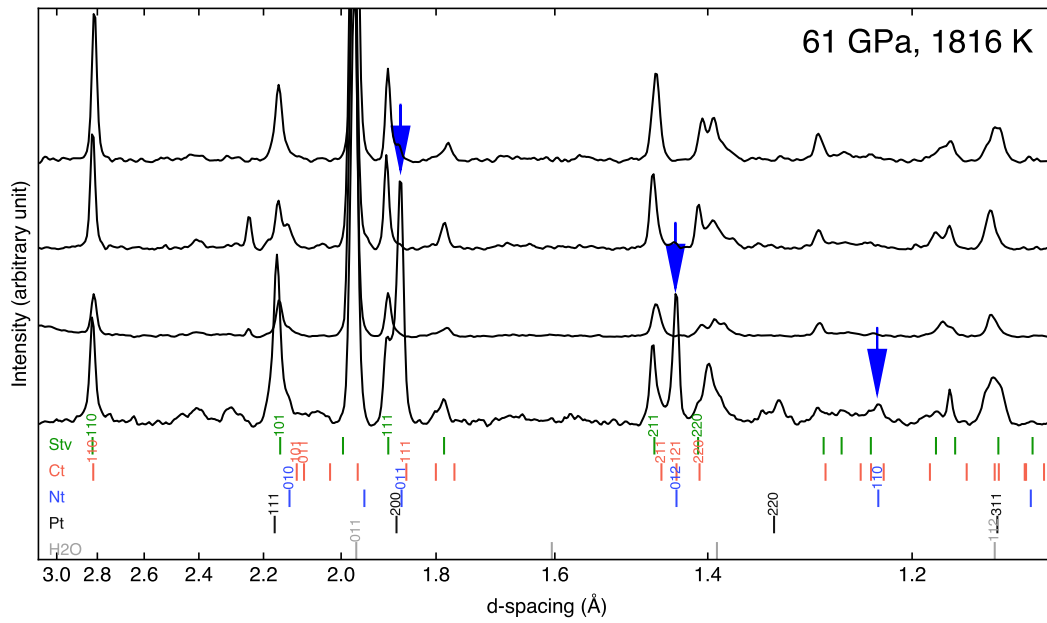

**Fig. S4. X-ray diffraction patterns (wavelength 0.3344 Å) measured during heating cycle of a spot at ~61 GPa.** The bars at the bottom of the diffraction patterns show the peak positions of Stv (green), Ct (orange), Nt (blue), Pt (pressure standard and laser coupler) (black), and H<sub>2</sub>O (pressure medium) (gray). The blue arrows highlight the peak positions of the Nt phase (top: 5 minutes after the heating started; bottom: 17 minutes after the heating started). At the beginning of the heating, diffraction patterns show more features related to the Stv and Ct phases. The Stv/Ct features become weaker with heating while the Nt peaks become more intense and sharp, although they do not disappear completely in this run.



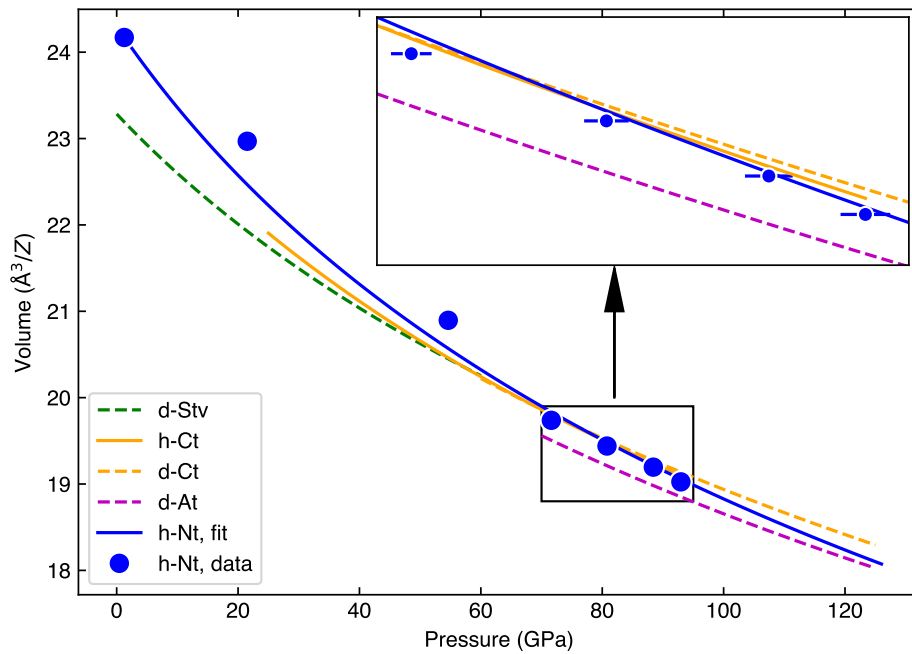

**Fig. S5.** Pressure–volume relations for the niccolite-type hydrous silica phase (blue solid circles) together with a fit to the Birch–Murnaghan equation (blue curve). The unit-cell volumes are normalized with respect to the number of chemical formula in a unit cell ( $Z$ ). For comparison, we present the compressional curves of dry stishovite (d-Stv), dry Ct phase (d-Ct), hydrous Ct phase (h-Ct), and dry  $\alpha$ -PbO<sub>2</sub> phase (d-At, seifertite) (14, 15). The inset highlights the high-pressure data.

## References

1. SH Shim, *PeakPo - A python software for X-ray diffraction analysis at high pressure and high temperature*. Zenodo., (2017).
2. C Nisr, SH Shim, K Leinenweber, A Chizmeshya, Raman spectroscopy of water-rich stishovite and dense high-pressure silica up to 55 GPa. *Am. Mineral.* **102**, 2180–2189 (2017).
3. K Spektor, et al., Ultrahydrous stishovite from high-pressure hydrothermal treatment of SiO<sub>2</sub>. *Proc. Natl. Acad. Sci.* **108**, 20918–20922 (2011).
4. D Pearson, et al., Hydrous mantle transition zone indicated by ringwoodite included within diamond. *Nature* **507**, 221–224 (2014).
5. JR Smyth, et al., Structural systematics of hydrous ringwoodite and water in Earth’s interior. *Am. Mineral.* **88**, 1402–1407 (2003).
6. K Spektor, et al., Formation of hydrous stishovite from coesite in high-pressure hydrothermal environments. *Am. Mineral.* **101**, 2514–2524 (2016).
7. T Demuth, Y Jeanvoine, J Hafner, J Angyan, Polymorphism in silica studied in the local density and generalized-gradient approximations. *J. Physics: Condens. Matter* **11**, 3833 (1999).
8. D Andrault, RJ Angel, JL Mosenfelder, TL Bihan, Equation of state of stishovite to lower mantle pressures. *Am. Mineral.* **88**, 301–307 (2003).
9. M Paterson, The determination of hydroxyl by infrared absorption in quartz, silicate glasses and similar materials. *Bull. Miner.* **105**, 20–29 (1982).
10. DR Bell, GR Rossman, Water in earth’s mantle: the role of nominally anhydrous minerals. *Science* **255**, 1391 (1992).
11. AR Pawley, PF McMillan, JR Holloway, Hydrogen in stishovite, with implications for mantle water content. *Science* **261**, 1024–1024 (1993).
12. P Dorogokupets, A Dewaele, Equations of state of MgO, Au, Pt, NaCl-B1, and NaCl-B2: Internally consistent high-temperature pressure scales. *High Press. Res.* **27**, 431–446 (2007).
13. WR Panero, JS Pigott, DM Reaman, JE Kabbes, Z Liu, Dry (Mg,Fe)SiO<sub>3</sub> perovskite in the Earth’s lower mantle. *J. Geophys. Res. Solid Earth* **120**, 894–908 (2015).
14. C Nisr, et al., Phase transition and equation of state of dense hydrous silica up to 63 GPa. *J. Geophys. Res. Solid Earth* **122**, 6972–6983 (2017).
15. B Grocholski, SH Shim, V Prakapenka, Stability, metastability, and elastic properties of a dense silica polymorph, seifertite. *J. Geophys. Res. Solid Earth* **118**, 4745–4757 (2013).
